# Supplementary material
Source: MDPI journal article supplement (https://www.mdpi.com/2221-3759/10/2/19)
Supplement: s1 [file s1]

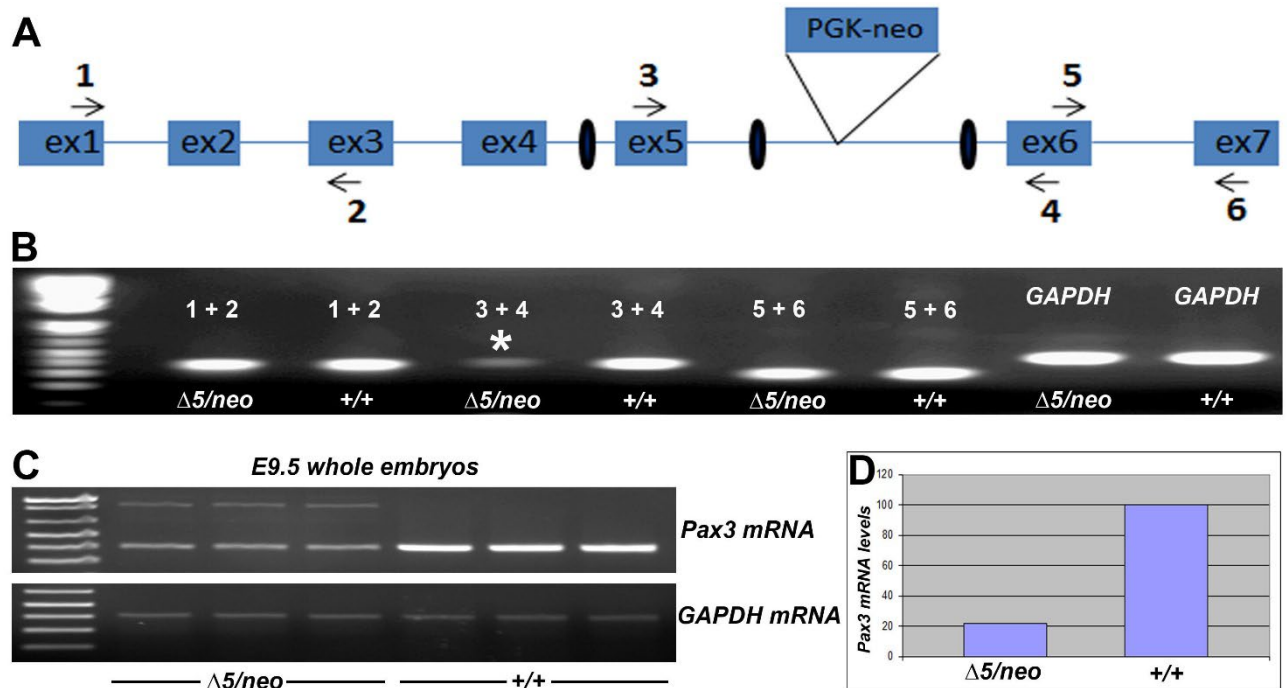

**Supplemental Figure S1. Impaired splicing results in reduced *Pax3* mRNA expression in *Pax3<sup>Δ5/neo</sup>* hypomorphic mutants.** (A) Schematic of *Pax3<sup>neo</sup>* allele. Numbered arrows indicate the location of three sets of forward (on top) and reverse (on bottom) *Pax3* PCR primer pairs. Exon5 and PGK-neo cassette are each flanked by loxP sites. (B) RT-PCR analysis of *Pax3* and *GAPDH* mRNA expression levels from E9.5 pooled whole *Pax3<sup>Δ5/neo</sup>* and wildtype (+/+) embryo lysates. The strategy of primer combination (1+2) and (5+6) amplifies wildtype, *Neo* and Δ5 mutant allele *Pax3* mRNA at 5' (1+2) and 3' (5+6) regions, revealed that *Pax3<sup>neo</sup>* and wildtype mRNA levels are similar. However, the primer combination (3+4) amplifies only wildtype *Pax3* mRNA (as PGK-neo band is too large to amplify within PCR cycle time), and this reveals that in *Pax3<sup>Δ5/neo</sup>* mutants there is a >80% reduction (indicated by \*) in *Pax3* mRNA relative to wildtype levels. *GAPDH* was used as a loading control. (C) RT-PCR detection of *Pax3* in triplicate E9.5 *Pax3<sup>Δ5/neo</sup>* and wildtype embryos. Note when *Pax3* mRNA was amplified using primer combination (3+4) with prolonged extension times, this enables detection of the abnormally spliced amplicon (top band 850bp) in *Pax3<sup>Δ5/neo</sup>* mutants but not controls. This indicates exon5-6 splicing of mRNA transcribed from *Pax3<sup>neo</sup>* allele is impaired due to presence of PGK-neo cassette. (D) *Pax3* mRNA levels was determined by densitometry and normalized to *GAPDH*. Relative to 100% expression in wildtype, there is only ~20% normal *Pax3* within the E9.5 *Pax3<sup>Δ5/neo</sup>* mutants.

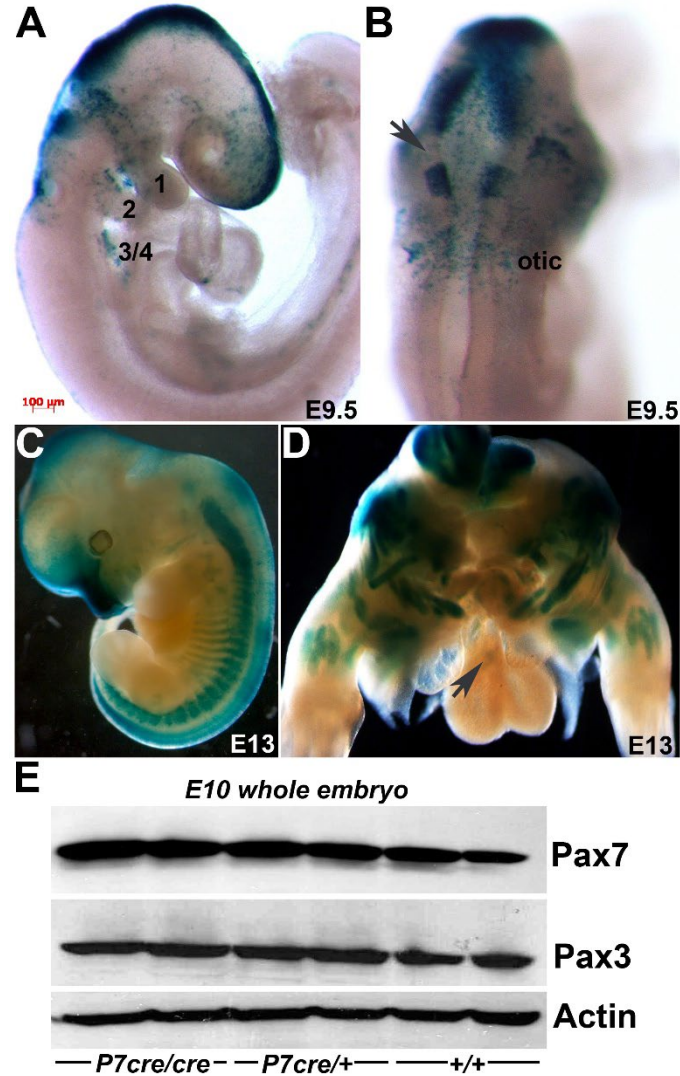

**Supplemental Figure S2. *Pax7*<sup>Cre</sup> knockin recapitulates endogenous *Pax7* expression.** (A,B) Right lateral (A) and dorsal (B) view of *Pax7*<sup>Cre</sup>/R26<sup>YlacZ</sup> X-Gal stained E9.5 embryo, illustrating only robust reporter expression within cranial neural tube and craniofacial region but not more caudal regions. Note *Pax7*-marked neural crest emigration streams towards the pharyngeal arches (1-4), and the regional localization of *Pax7*<sup>Cre</sup> within the hindbrain and absence from rhombomeres 3 (arrow in B) and 5. (C,D) Left lateral view at whole E13 X-Gal stained embryo and same embryo with head removed. Arrow in (D) points to a small population of *lacZ* cells that have colonized the normal outflow of the heart. (E) Western analysis of Pax7, Pax3 and  $\beta$ Actin levels in duplicate *Pax7*<sup>Cre/Cre</sup>, *Pax7*<sup>Cre/+</sup> and wildtype (*+/+*) E10 whole embryo lysates. Note that all three genotypes express similar levels of Pax7 and Pax3, indicating that the knockin of *Cre* cDNA at the *Pax7* 3'UTR does not affect endogenous Pax7 not Pax3 expression levels. Scale A,B, 100 $\mu$ m.
